# Supplementary material for: Characteristics and beach safety knowledge of beachgoers on unpatrolled surf beaches in Australia
Source: Copernicus journal article supplement (doi:10.5194/nhess-2021-318), 2021-11-24
Supplement: Supplementary file [file nhess-2021-318-AC1-supplement.pdf]

## Supplement 1 – Representative Surf Conditions at Surveyed Beaches

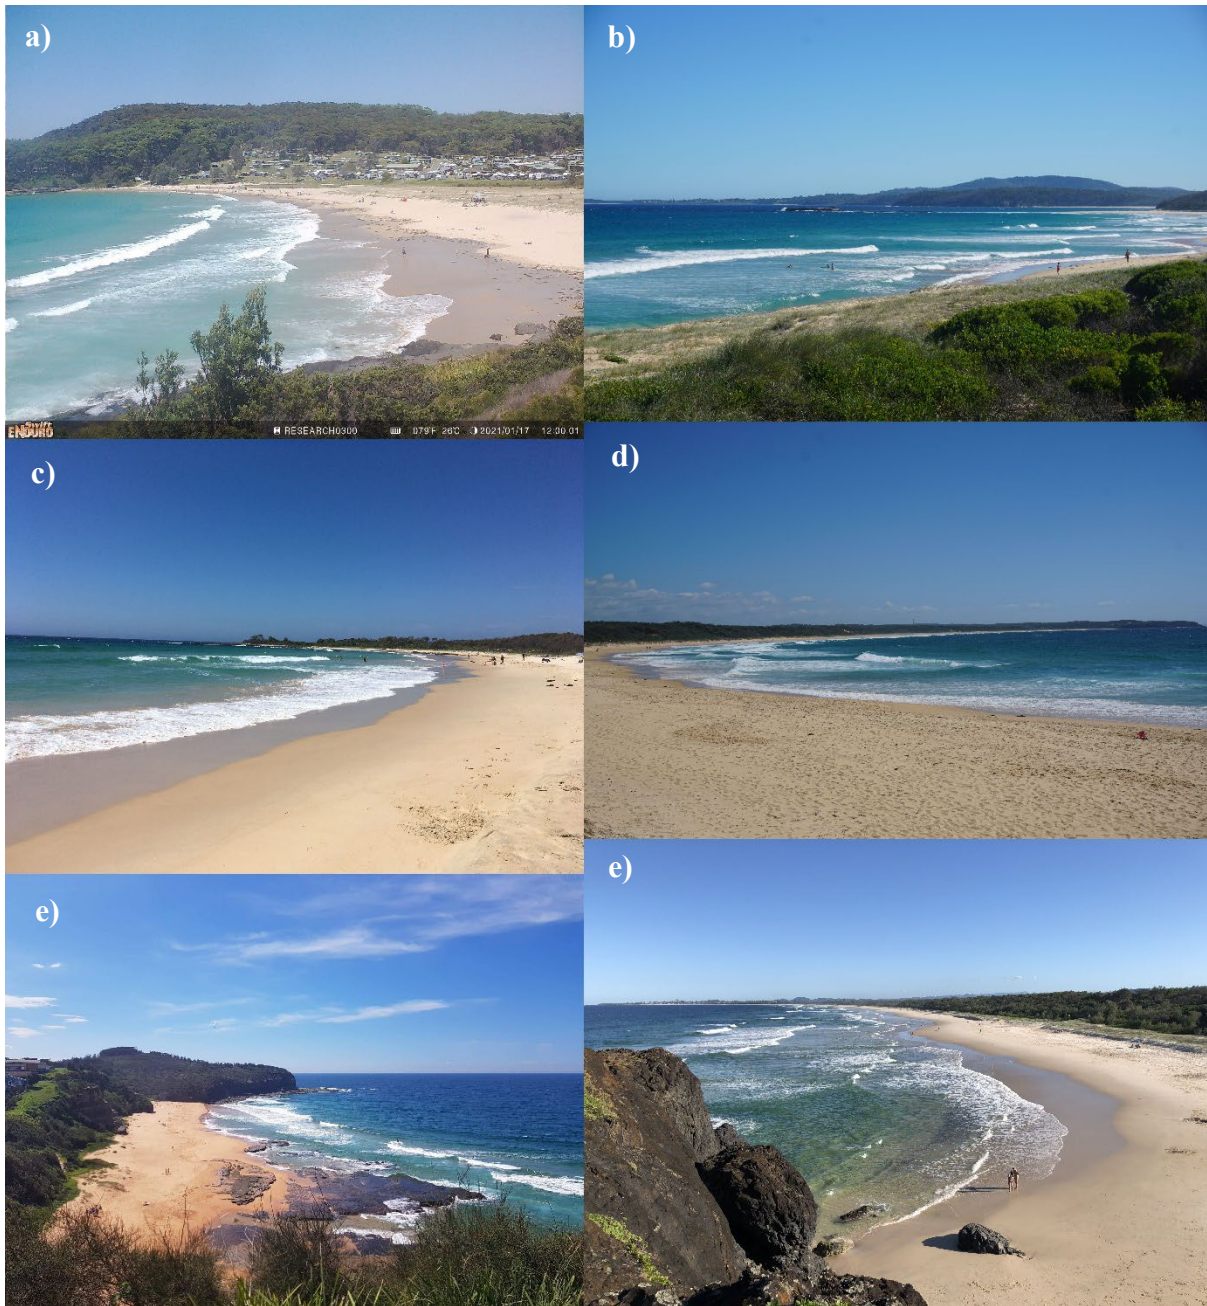

**Figure S1.** Examples of typical surf conditions during the survey period at each beach location: a) Merry Beach (17/1/2021); b) Tabourie Beach (10/1/2021); c) Racecourse Beach (13/1/2021); d) Wairo Beach (17/1/2021); e) Turimetta Beach (13/3/2021); f) Dreamtime Beach (15/4/2021). Rip currents are present at each beach and can be identified by prominent and narrow dark gaps between regions of breaking waves (whitewater). Photos courtesy M. Harley (a); L. Uebelhoer (b, c, d); W. Koon (e); R. Brander (f).
