# Supplementary material for: Characteristics and beach safety knowledge of beachgoers on unpatrolled surf beaches in Australia
Source: Copernicus journal article supplement (doi:10.5194/nhess-2021-318), 2021-11-24

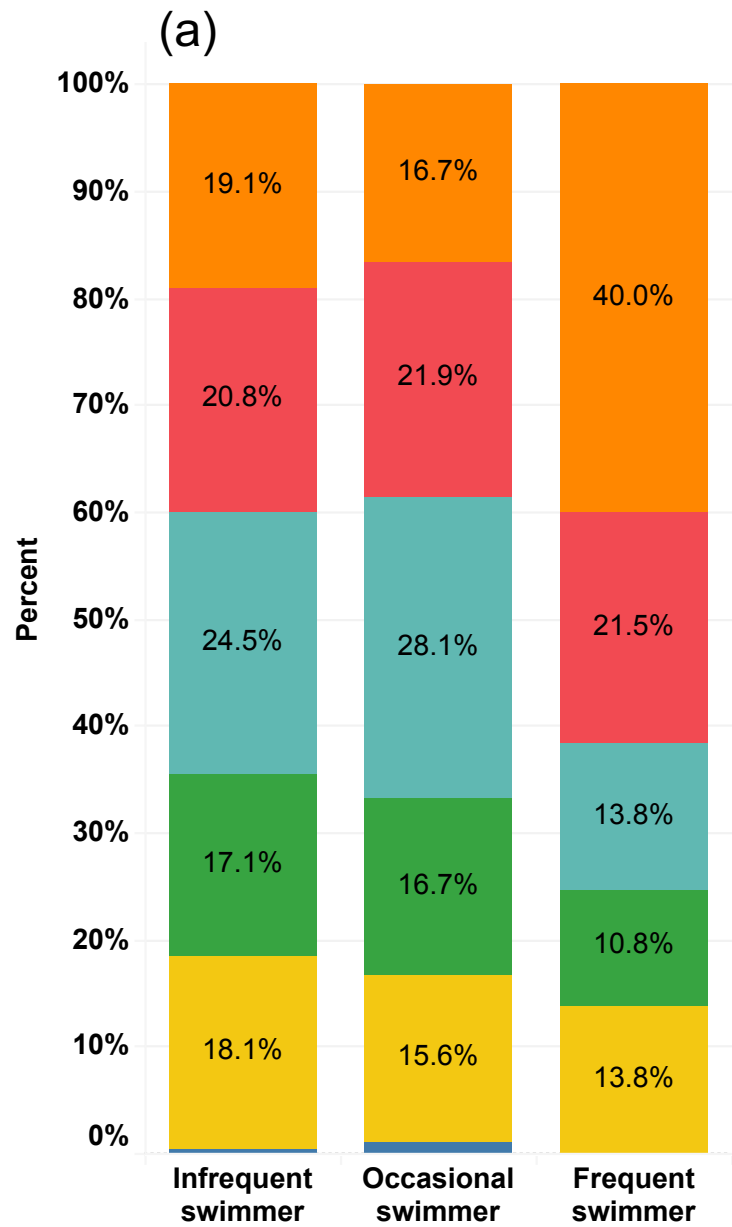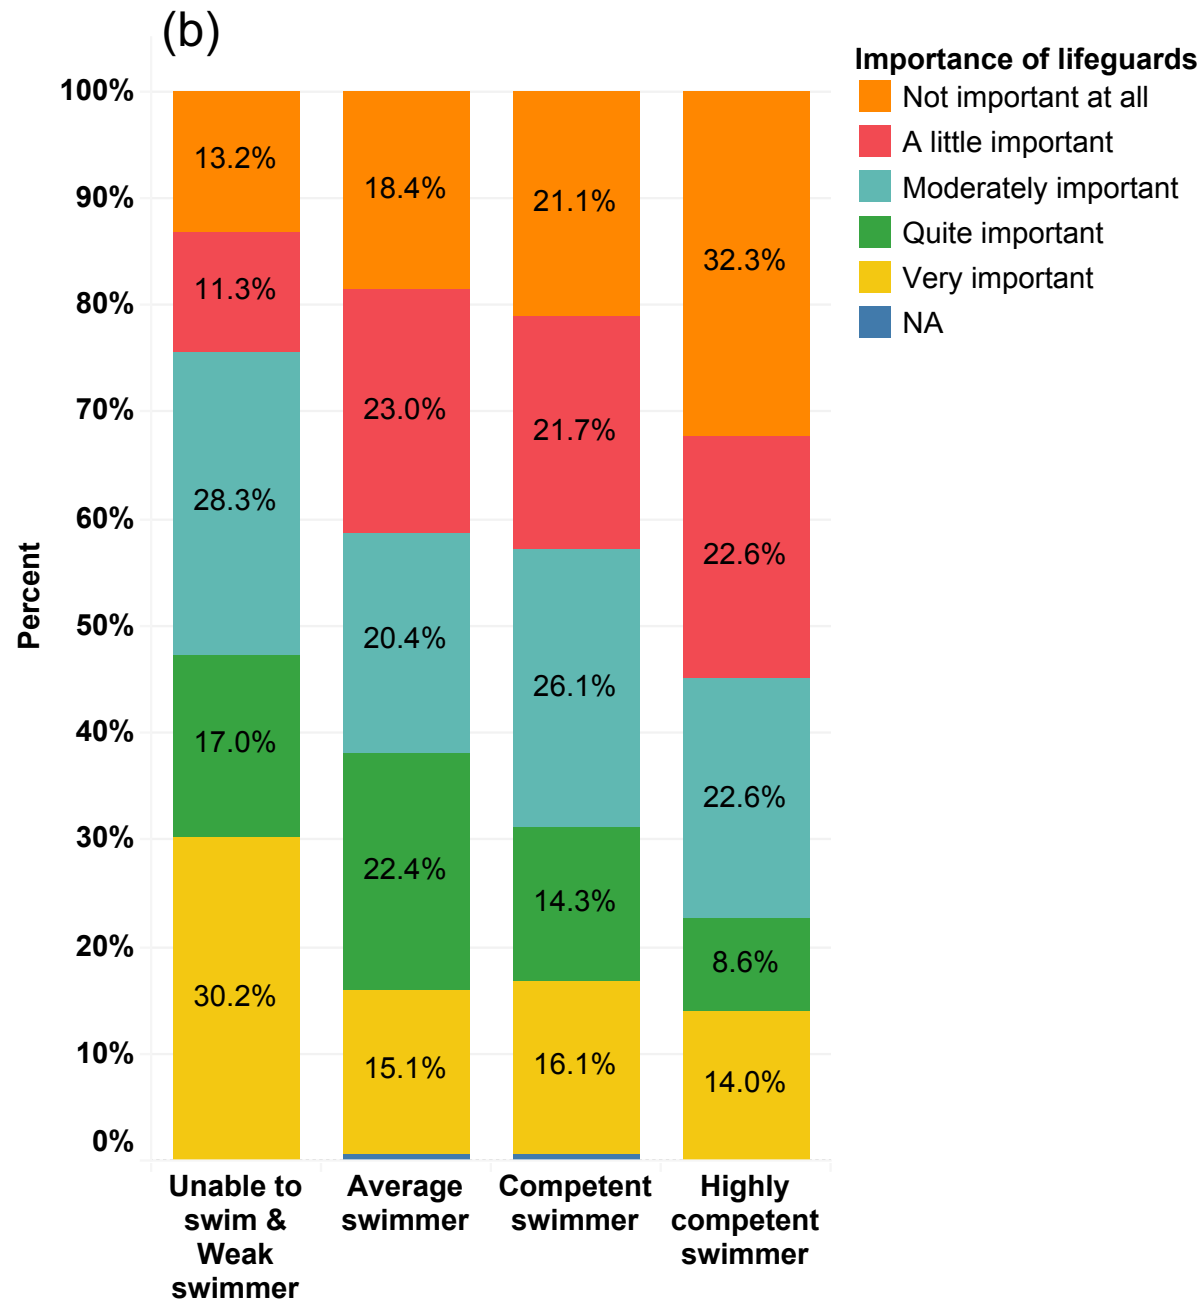

Supplement: Supplementary file [file nhess-2021-318-AC2-supplement.pdf]
